# Supplementary material for: 0D MXene quantum dots/2D MXene derived metal–organic frameworks for enhanced nonlinear optical absorption across spectral and temporal regimes
Source: Royal Society of Chemistry journal article supplement (doi:10.1039/d3tc03437b), 2023-01-01
Supplement: d3tc03437b1.pdf [file d3tc03437b1.pdf]

## Electronic Supplementary Information

### **0D MXene quantum dots/2D MXene derived metal-organic frameworks for enhanced nonlinear optical absorption across spectral and temporal regimes†**

Naying Shan,<sup>a</sup> Zhiyuan Wei,<sup>a</sup> Zihao Guan,<sup>a</sup> Yang Zhao,<sup>a</sup> Fang Liu,<sup>a</sup> Lulu Fu,<sup>a</sup> Yanyan Xue,<sup>b</sup> Zhipeng Huang,<sup>a</sup> Mark G. Humphrey,<sup>c</sup> Jun Xu,<sup>b</sup> and Chi Zhang<sup>a,\*</sup>

<sup>a</sup> *China-Australia Joint Research Center for Functional Molecular Materials, School of Chemical Science and Engineering, Tongji University, Shanghai 200092, China. E-mail: chizhang@tongji.edu.cn*

<sup>b</sup> *School of Physical Science and Engineering, Tongji University, Shanghai 200092, China*

<sup>c</sup> *Research School of Chemistry, Australian National University, Canberra, Australian Capital Territory 2601, Australia*

## 1. Experimental Procedures

**1.1. Preparation of TPPCOOMe.** Methyl 4-formylbenzoate (0.086 mol, 14.41 g) was fully dissolved in propionic acid (250 mL) at 60 °C in the 500 mL two-necked flask. Pyrrole (0.086 mol, 6.09 mL) in propionic acid (20 mL) was added dropwise. Then the mixture was refluxed for 12 h. After the reaction, the mixture was cooled to room temperature. The precipitates were obtained by suction filtration and washed with ethanol (EtOH), ethyl acetate (EA), and tetrahydrofuran (THF), respectively. The collected precipitates were dried in an oven for 12 h, and a purple powder as meso-tetra(4-carboxy-phenyl) porphyrin 5,10,15,20-tetrakis(4-methoxycarbonylphenyl) porphyrin (TPPCOOMe) was obtained (4.9 mmol, 4.2 g, yield 23%). <sup>1</sup>H NMR (400 MHz, CDCl<sub>3</sub>-d, TMS, δ/ppm): 8.80 (s, 8H), 8.43 (dt, 8H, *J* = 8 Hz), 8.28 (dt, 8H, *J* = 8 Hz), 4.14 (s, 2H), 4.09 (s, 10H), -2.83 (s, 2H).

**1.2. Preparation of TCPP.** The obtained TPPCOOMe (0.75 g) was stirred in a mixture of THF (25 mL) and methanol (MeOH) (25 mL), to which a solution of sodium hydroxide (2.40 g, 60.00 mmol) in H<sub>2</sub>O (25 mL) was introduced. Then the mixture was refluxed for 12 h. After the reaction, the mixture was cooled to room temperature. THF and MeOH were evaporated. Additional water was added to the resulting aqueous phase and the mixture was heated until the solid was fully dissolved. Then the solution was acidified with 1 M hydrochloric acid (HCl) until no further precipitate was detected. The precipitate was washed with water, collected by centrifugation, and dried under vacuum for obtaining the product of meso-tetra(4-carboxy-phenyl) porphyrin (TCPP) (0.84 mmol, 0.66 g, yield 96%). <sup>1</sup>H NMR (400 MHz, DMSO-*d*<sub>6</sub>, TMS, δ/ppm): 8.86 (s, 8H), 8.38 (d, 8H), 8.34 (d, 8H), -2.94 (s, 2H).

**1.3. Preparation of V<sub>2</sub>C MXene.** 1 g of V<sub>2</sub>AlC MAX powder (200 mesh) was immersed in 20 ml of hydrofluoric acid (HF) (40%) and stirred at 35 °C for 96 hours. Wash the mixture with deionized water and centrifuged (3000 r.p.m) to collect the sediment. The washing procedure was repeated until the pH of the supernatant reaches approximately 6. The V<sub>2</sub>C was obtained by filtration.

**1.4. Preparation of d-V<sub>2</sub>C MXene.** As-etched sediment V<sub>2</sub>C MXene was immersed in 10 mL of tetramethylammonium hydroxide (TMAOH) and stirred for 24 hours at room temperature for delamination. Subsequently, separate the supernatant by centrifugation to obtain clay-like sediment, namely, d-V<sub>2</sub>C MXene.

**1.5. Preparation of Ti<sub>3</sub>C<sub>2</sub> MXene.** The Ti<sub>3</sub>AlC<sub>2</sub> powder was etched to remove the Al layers by HF to obtain Ti<sub>3</sub>C<sub>2</sub> nanosheets. First, 1 g of Ti<sub>3</sub>AlC<sub>2</sub> MAX (200 mesh) powder was added to 20 mL of HF (40%) and stirred for 48 hours at room temperature. Wash the obtained powder with ethanol and deionized water several times by centrifugation at 9000 rpm. The washing

procedure was repeated until the pH of the supernatant reaches approximately 6. After discarding the supernatant, the  $\text{Ti}_3\text{C}_2$  nanosheets were freeze-dried in a vacuum overnight.

**1.6. Preparation of  $\text{Ti}_3\text{C}_2$  QD.** The  $\text{Ti}_3\text{C}_2$  MXene nanosheets were placed in 80 mL of N, N-dimethylformamide (DMF) and ultrasonicated for half an hour. Transfer the mixture to a 100 mL Teflon autoclave at 150 °C for 6 hours. Finally,  $\text{Ti}_3\text{C}_2$  QD was obtained by filtration through a 0.22  $\mu\text{m}$  membrane.

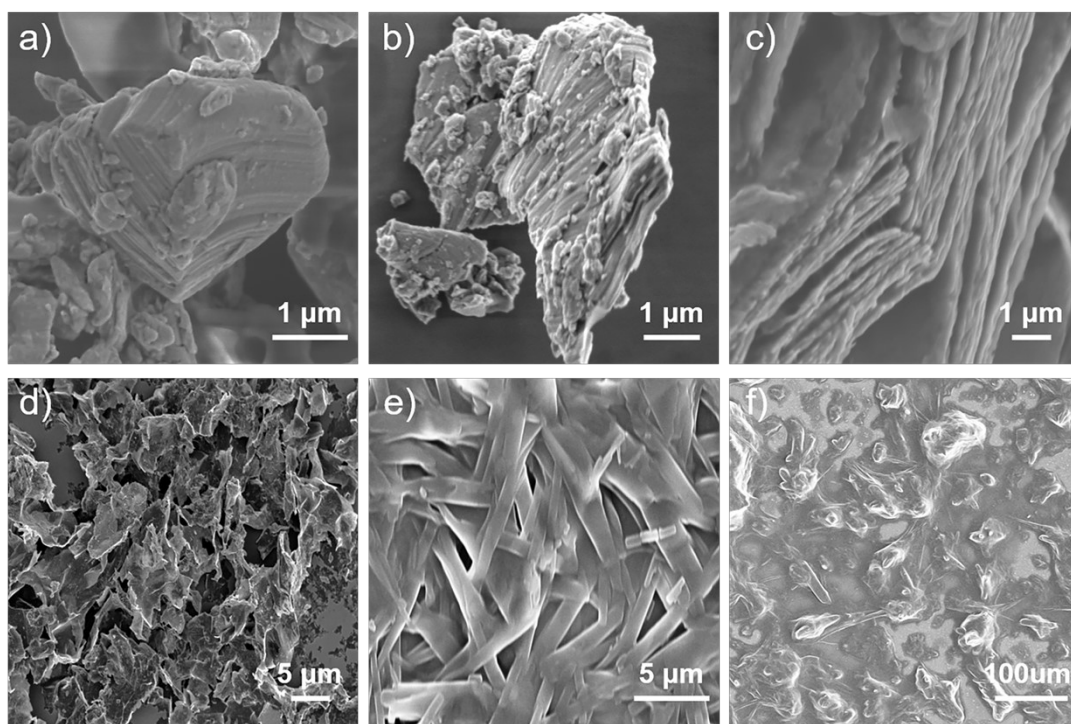

**Figure S1.** Scanning electron microscope (SEM) images of (a)  $V_2AlC$ , (b)  $Ti_3AlC_2$ , (c) d- $V_2C$  MXene, (d)  $Ti_3C_2$  MXene, (e)  $V_2C$  PMOF, and (f)  $Ti_3C_2$  QD/ $V_2C$  PMOF.

| <b>d-V<sub>2</sub>C</b> |                 | <b>Ti<sub>3</sub>C<sub>2</sub> QD</b> |                 | <b>V<sub>2</sub>C MOF</b> |                 | <b>Ti<sub>3</sub>C<sub>2</sub> QD/V<sub>2</sub>C MOF</b> |                 |
|-------------------------|-----------------|---------------------------------------|-----------------|---------------------------|-----------------|----------------------------------------------------------|-----------------|
| <b>Element</b>          | <b>Atom (%)</b> | <b>Element</b>                        | <b>Atom (%)</b> | <b>Element</b>            | <b>Atom (%)</b> | <b>Element</b>                                           | <b>Atom (%)</b> |
| <b>C 1s</b>             | 56.25           | C 1s                                  | 48.74           | C 1s                      | 77.23           | C 1s                                                     | 59.85           |
| <b>O 1s</b>             | 29.39           | O 1s                                  | 22.48           | O 1s                      | 16.64           | O 1s                                                     | 20.43           |
| <b>V 2p</b>             | 10.39           | Ti 2p                                 | 17.46           | V 2p                      | 2.00            | V 2p                                                     | 0.41            |
| <b>F 1s</b>             | 3.98            | F 1s                                  | 11.32           | N 1s                      | 4.13            | F 1s                                                     | 6.01            |
|                         |                 |                                       |                 |                           |                 | Ti 2p                                                    | 12.00           |
|                         |                 |                                       |                 |                           |                 | N 1s                                                     | 1.29            |

**Table S1.** The atomic percentages in corresponding samples.

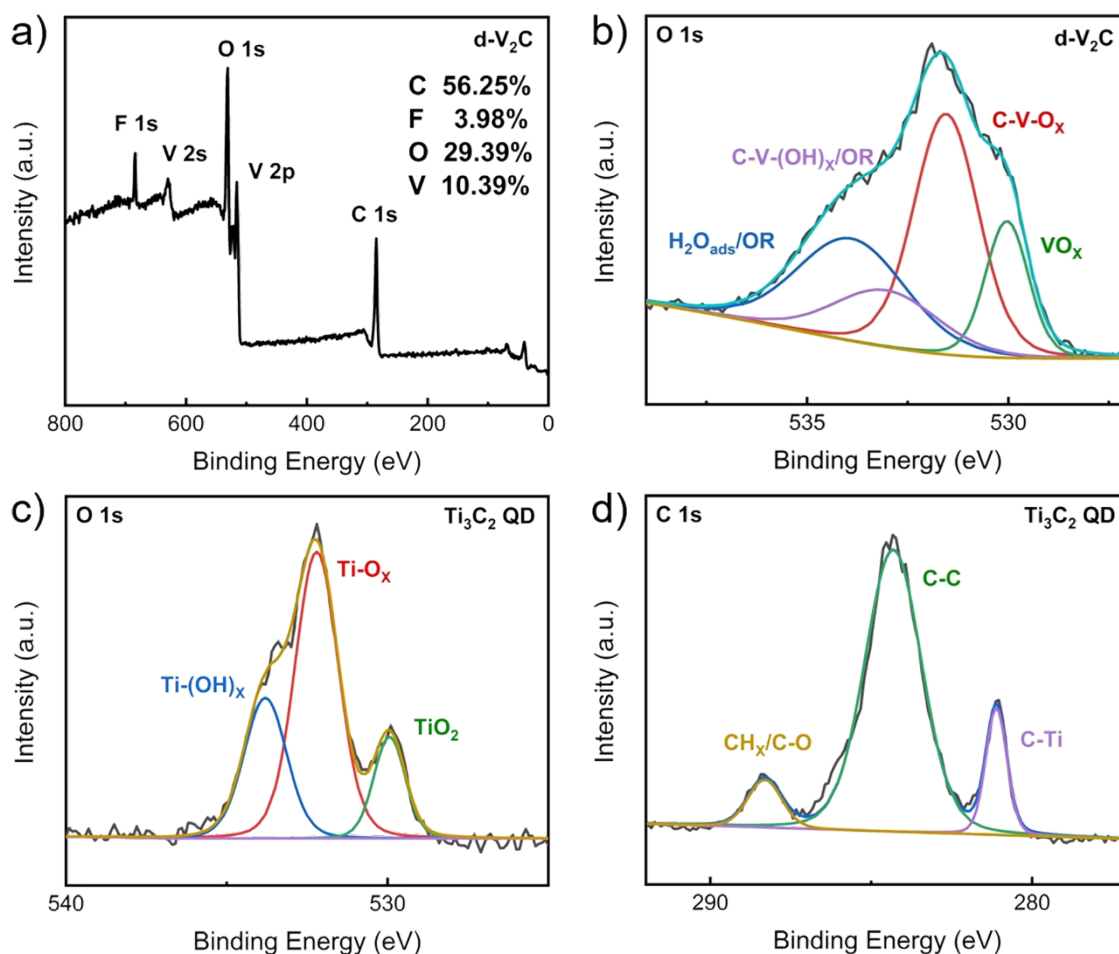

**Figure S2.** (a) Survey X-ray photoelectron spectroscopy (XPS) spectrum of d-V<sub>2</sub>C. High-resolution XPS spectra of (b) O 1s in d-V<sub>2</sub>C MXene. The O 1s region revealed the presence of VO<sub>x</sub> (~ 530.0 eV), C–V–O<sub>x</sub> (~ 531.5 eV), C–V–(OH)<sub>x</sub> (~ 533.1 eV), and H<sub>2</sub>O<sub>ads</sub> (~ 534.1 eV). High-resolution XPS spectra of (c) O 1s and (d) C 1s in Ti<sub>3</sub>C<sub>2</sub> QD. The O 1s region consisted of three components, corresponding to TiO<sub>2</sub> (~ 529.9 eV), C–Ti–O<sub>x</sub> (~ 532.2 eV), and Ti–(OH)<sub>x</sub> (~ 533.8 eV), which confirmed the surface terminations of O species. Correspondingly, the C 1s region was fitted by three peaks, about C–Ti (~ 281.1 eV), C–C (~ 284.3 eV), and CH<sub>x</sub>/C–O (~ 288.3 eV).

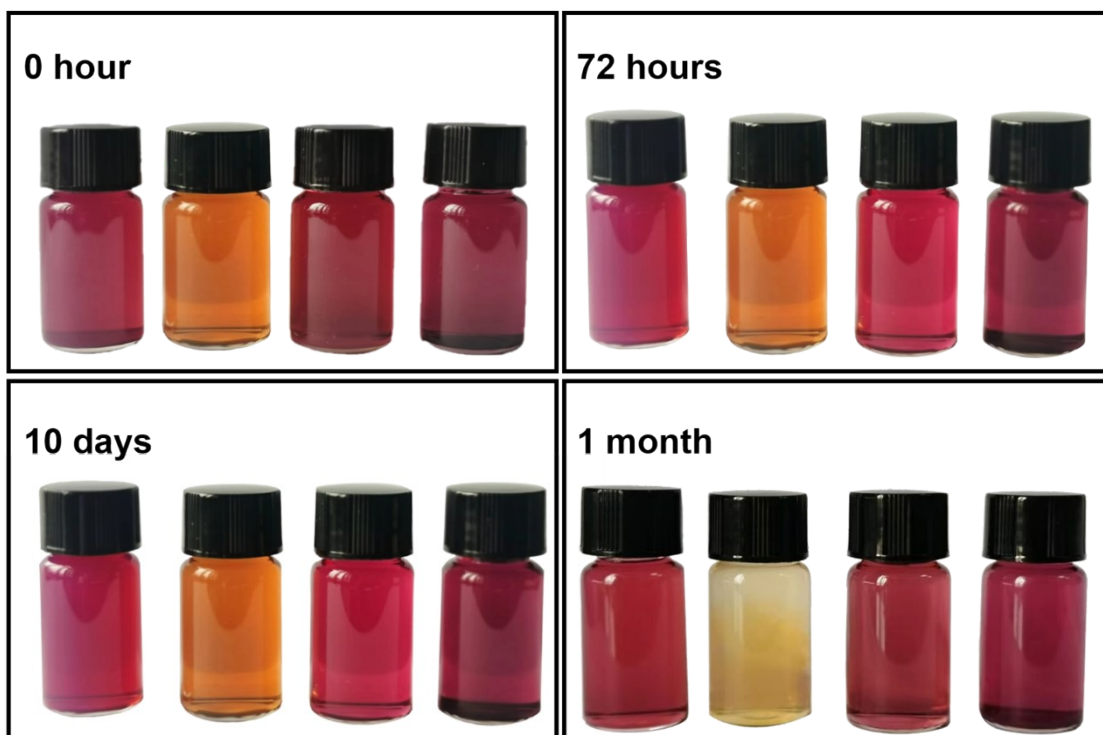

**Figure S3.** Photographs of TCPP,  $\text{Ti}_3\text{C}_2$  QD,  $\text{V}_2\text{C}$  PMOF, and  $\text{Ti}_3\text{C}_2$  QD/ $\text{V}_2\text{C}$  PMOF dispersions with all concentrations at 0.1 mg/mL. The first photograph exhibits the fresh dispersions after sonication for 10 minutes; the following parts show the dispersions after storage for 72 hours, 10 days, and 1 month.

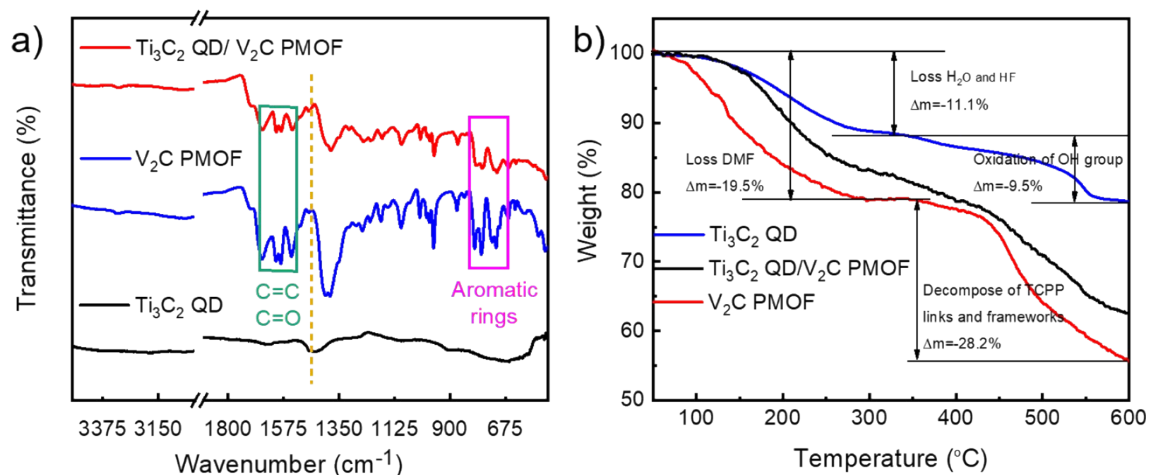

**Figure S4.** (a) Fourier transform infrared spectra (FTIR) of  $\text{Ti}_3\text{C}_2$  QD, V<sub>2</sub>C PMOF, and  $\text{Ti}_3\text{C}_2$  QD/V<sub>2</sub>C PMOF. The N–H stretching vibration and in-plane vibration peaks are observed at 3311 and 964 cm<sup>-1</sup> in V<sub>2</sub>C PMOF, as well as at 3316 and 963 cm<sup>-1</sup> in  $\text{Ti}_3\text{C}_2$  QD/V<sub>2</sub>C PMOF hybrids. Moreover, C–H bending vibrations of the organic ligands TCPP are confirmed in V<sub>2</sub>C PMOF (1382 cm<sup>-1</sup>) and  $\text{Ti}_3\text{C}_2$  QD/V<sub>2</sub>C PMOF (1398 cm<sup>-1</sup>), respectively. (b) Thermal gravimetric analysis (TGA) of  $\text{Ti}_3\text{C}_2$  QD, V<sub>2</sub>C PMOF, and  $\text{Ti}_3\text{C}_2$  QD/V<sub>2</sub>C PMOF. The first phase corresponds to the separation and loss of the solution DMF, while the second phase corresponds to the decomposition of the organic components TCPP and frameworks, occurring from 350 °C with an abrupt weight loss. The decomposition of  $\text{Ti}_3\text{C}_2$  QD mainly occurs in two phases: the first stage corresponds to the loss of molecules (water and HF) and the second phase originates from oxidized OH groups. All of these processes occur in the heterostructure  $\text{Ti}_3\text{C}_2$  QD/V<sub>2</sub>C PMOF.



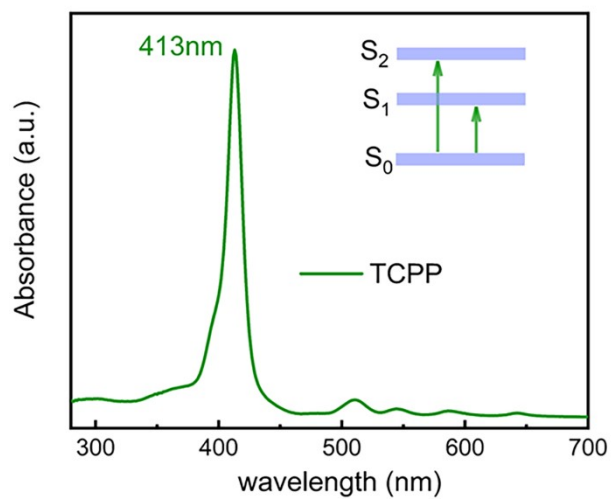

**Figure S5.** Ultraviolet-visible (UV-Vis) absorption spectrum of TCPP.

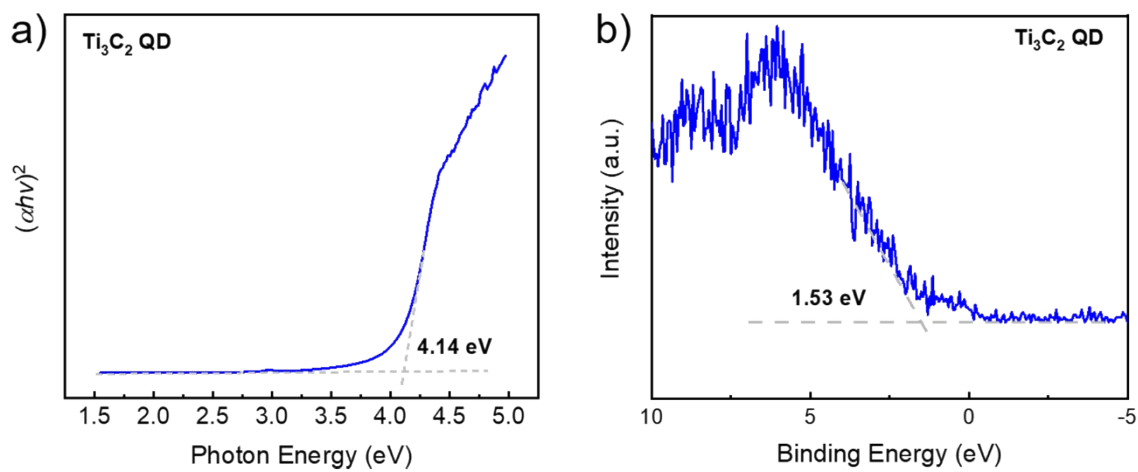

**Figure S6.** (a) The bandgap calculated by Tauc plot of  $\text{Ti}_3\text{C}_2$  QD. (b) To determine the valence band (VB), XPS-VB spectra of  $\text{Ti}_3\text{C}_2$  QD are plotted.

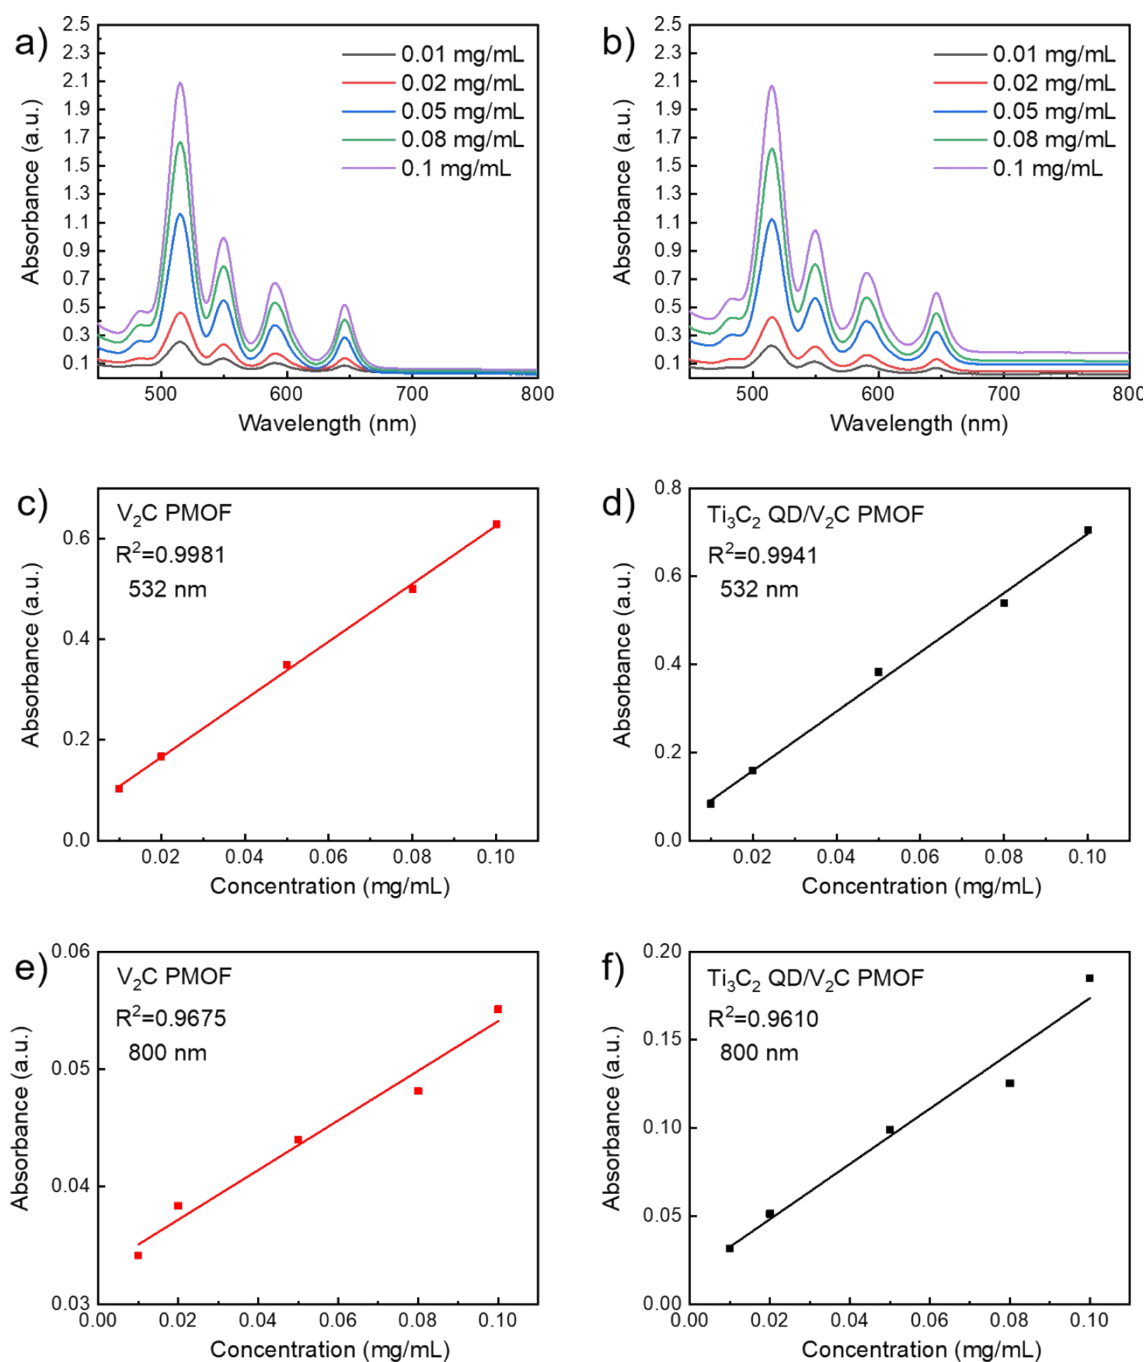

**Figure S7.** The absorption spectra of (a)  $V_2C$  PMOF and (b)  $Ti_3C_2$  QD/ $V_2C$  PMOF at different concentrations. The absorbance of (c)  $V_2C$  PMOF and (d)  $Ti_3C_2$  QD/ $V_2C$  PMOF at different concentrations under the irradiation of 532 nm. The absorbance of (e)  $V_2C$  PMOF and (f)  $Ti_3C_2$  QD/ $V_2C$  PMOF at different concentrations under the irradiation of 800 nm. The straight lines are the linear fitting results of the data.

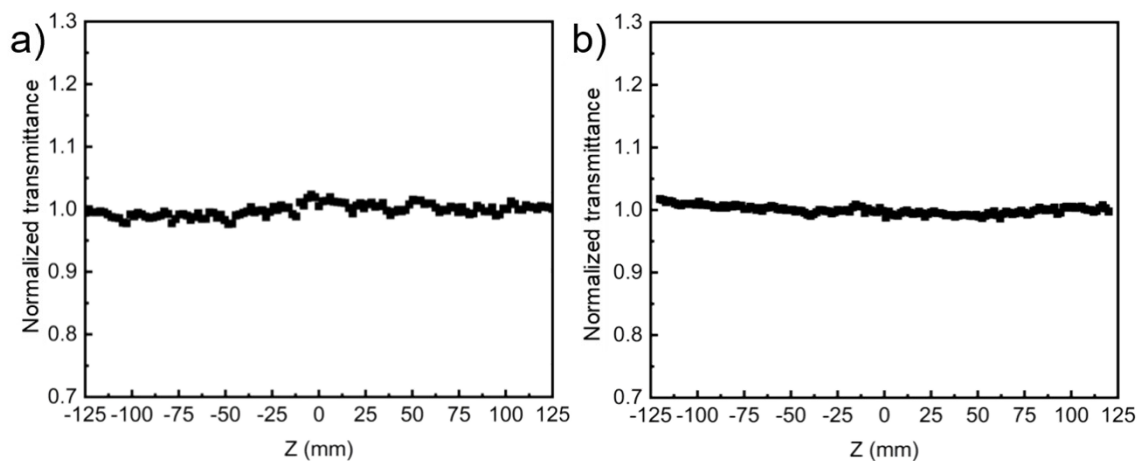

**Figure S8.** Open aperture Z-scan curves for blank solvent DMF (a) in the nanosecond (ns) regime of 532 nm under input fluence energy of 110  $\mu\text{J}$  and (b) in the femtosecond (fs) regime of 800 nm under input fluence energy of 60 nJ.

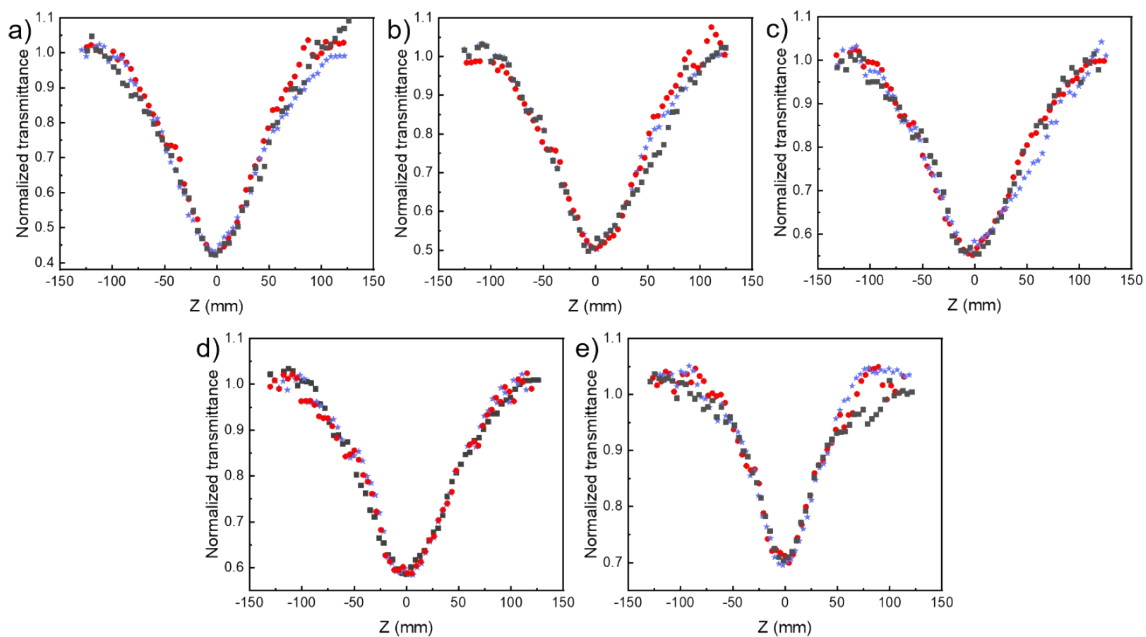

**Figure S9.** Open aperture Z-scan results of  $V_2C$  PMOF in the ns regime of 532 nm at different incident pulse energies of (a) 110  $\mu\text{J}$ , (b) 90  $\mu\text{J}$ , (c) 70  $\mu\text{J}$ , (d) 50  $\mu\text{J}$ , and (e) 30  $\mu\text{J}$  pulsed light for the 0 hour, 72-hour, and 10-day storage.

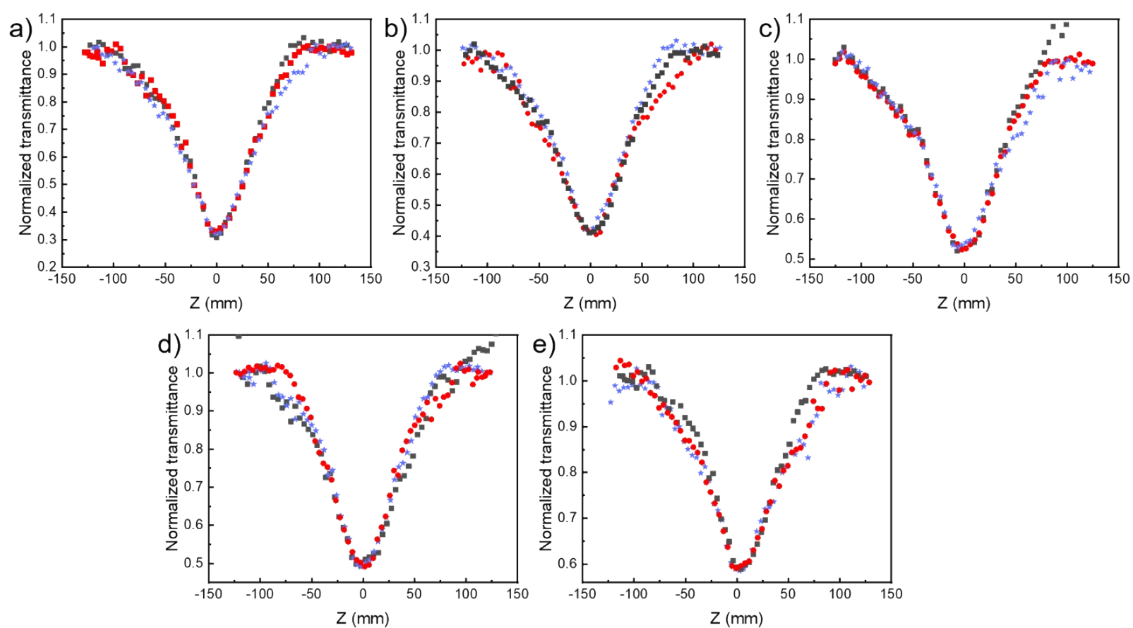

**Figure S10.** Open aperture Z-scan results of  $\text{Ti}_3\text{C}_2$  QD/ $\text{V}_2\text{C}$  PMOF in the ns regime of 532 nm at different incident pulse energies of (a) 110  $\mu\text{J}$ , (b) 90  $\mu\text{J}$ , (c) 70  $\mu\text{J}$ , (d) 50  $\mu\text{J}$ , and (e) 30  $\mu\text{J}$  pulsed light for the 0 hour, 72-hour, and 10-day storage.

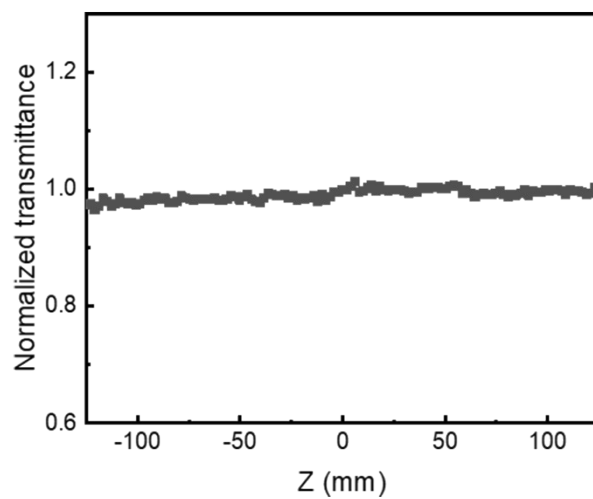

**Figure S11.** Open aperture Z-scan results of  $\text{Ti}_3\text{C}_2$  QD/ $\text{V}_2\text{C}$  PMOF in the ns regime of 1064 nm.

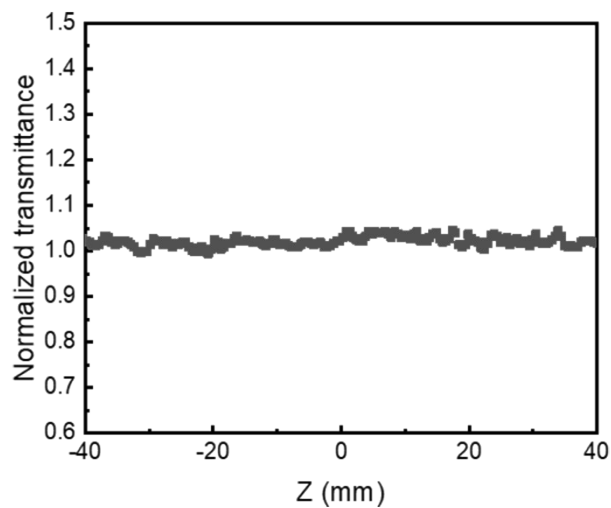

**Figure S12.** Open aperture Z-scan results of  $\text{Ti}_3\text{C}_2$  QD/ $\text{V}_2\text{C}$  PMOF heterostructure in the fs regime of 1030 nm.



**Table S2.** Performance comparison of optical limiting threshold.

| Samples                                                             | $\lambda$ (nm) | $F_{OL}$ (J cm <sup>-2</sup> ) |
|---------------------------------------------------------------------|----------------|--------------------------------|
| TPP <sup>[1]</sup>                                                  | 532            | 33                             |
| PIZA-1 <sup>[2]</sup>                                               | 532            | 5.04                           |
| C <sub>60</sub> @PIZA-1 <sup>[2]</sup>                              | 532            | 5.51                           |
| copper porphyrin <sup>[3]</sup>                                     | 532            | 1.7                            |
| zinc porphyrin <sup>[3]</sup>                                       | 532            | 1.3                            |
| Ni <sub>3</sub> HHTP <sub>2</sub> <sup>[4]</sup>                    | 532            | 4.19                           |
| Cu <sub>3</sub> HHTP <sub>2</sub> <sup>[4]</sup>                    | 532            | 1.93                           |
| Co <sub>3</sub> HHTP <sub>2</sub> <sup>[4]</sup>                    | 532            | 3.03                           |
| Pt-Ni NP/rGO <sup>[5]</sup>                                         | 532            | 1.92                           |
| Pt-Ni NP cluster/rGO <sup>[5]</sup>                                 | 532            | 1.42                           |
| F <sub>16</sub> PcGa-BP/PMMA <sup>[6]</sup>                         | 532            | 2.64                           |
| F <sub>16</sub> PcGaCl/PMMA <sup>[6]</sup>                          | 532            | 9.24                           |
| TPC <sup>[7]</sup>                                                  | 532            | 1.04                           |
| C <sub>60</sub> <sup>[8]</sup>                                      | 532            | 12.85                          |
| pyrazine-fused trithiasumanene <sup>[8]</sup>                       | 532            | 1.78                           |
| triselenasumanene <sup>[8]</sup>                                    | 532            | 2.43                           |
| GO <sup>[9]</sup>                                                   | 532            | 2.9                            |
| V <sub>2</sub> C PMOF (this work)                                   | 532            | 1.27                           |
| Ti <sub>3</sub> C <sub>2</sub> QD/V <sub>2</sub> C PMOF (this work) | 532            | 1.02                           |

**Table S3.** Linear and NLO parameters of  $\text{Ti}_3\text{C}_2$  QD, TCPP,  $\text{V}_2\text{C}/\text{TCPP}$ ,  $\text{V}_2\text{C}$  PMOF, and  $\text{Ti}_3\text{C}_2$  QD/ $\text{V}_2\text{C}$  PMOF in the ns regime of 532 nm (110  $\mu\text{J}$ ) and in the fs regime of 800 nm (60 nJ).  $I_0$ : laser intensity at focus;  $\alpha_0$ : linear absorption coefficient;  $\beta_{\text{eff}}$ : nonlinear absorption coefficient.

| Samples                                               | Laser  | $I_0$ ( $\mu\text{J}$ ) | $\beta_{\text{eff}}$ (cm $\text{GW}^{-1}$ ) |
|-------------------------------------------------------|--------|-------------------------|---------------------------------------------|
| $\text{Ti}_3\text{C}_2$ QD                            |        |                         | $3.13 \pm 0.55$                             |
| TCPP                                                  | 532 nm |                         | $124.94 \pm 2.27$                           |
| $\text{V}_2\text{C}/\text{TCPP}$                      | 12 ns  | 110                     | $54.29 \pm 1.24$                            |
| $\text{V}_2\text{C}$ PMOF                             | 10 Hz  |                         | $483.79 \pm 14.79$                          |
| $\text{Ti}_3\text{C}_2$ QD/ $\text{V}_2\text{C}$ PMOF |        |                         | $553.69 \pm 19.50$                          |
| $\text{Ti}_3\text{C}_2$ QD                            |        |                         | $-0.0043 \pm 1\text{E-}4$                   |
| TCPP                                                  | 800 nm |                         | —                                           |
| $\text{V}_2\text{C}/\text{TCPP}$                      | 34 fs  | 0.06                    | $0.0074 \pm 4\text{E-}4$                    |
| $\text{V}_2\text{C}$ PMOF                             | 1 kHz  |                         | $0.0353 \pm 2\text{E-}4$                    |
| $\text{Ti}_3\text{C}_2$ QD/ $\text{V}_2\text{C}$ PMOF |        |                         | $0.0495 \pm 5\text{E-}4$                    |

**Table S4.** NLO parameters of typical MOF, graphene derivatives, and organometallic hybrid materials.

| Samples                                                             | $\lambda$ (nm) | $I_0$ ( $\mu\text{J}$ ) | $\beta_{\text{eff}}$ (cm $\text{GW}^{-1}$ ) |
|---------------------------------------------------------------------|----------------|-------------------------|---------------------------------------------|
| TPP <sup>[1]</sup>                                                  | 532            | 8                       | 33                                          |
| GO <sup>[5]</sup>                                                   | 532            | 50                      | 1.22                                        |
| Pt NP/rGO <sup>[5]</sup>                                            | 532            | 50                      | 1.38                                        |
| Ni NP/rGO <sup>[5]</sup>                                            | 532            | 50                      | 1.29                                        |
| Pt-Ni NP/rGO <sup>[5]</sup>                                         | 532            | 50                      | 1.64                                        |
| Pt-Ni NP cluster/rGO <sup>[5]</sup>                                 | 532            | 50                      | 1.98                                        |
| Mn-TMPP <sup>[10]</sup>                                             | 532            | 10.3                    | 9                                           |
| Zn-TMPP <sup>[10]</sup>                                             | 532            | 10.3                    | 46                                          |
| Mn-THPP <sup>[10]</sup>                                             | 532            | 10.3                    | 9                                           |
| Zn-THPP <sup>[10]</sup>                                             | 532            | 10.3                    | 18                                          |
| Co-THPP (crystalline plates) <sup>[11]</sup>                        | 532            | 10.3                    | 24                                          |
| Co-THPP (flower-shaped clusters) <sup>[11]</sup>                    | 532            | 10.3                    | 70                                          |
| Co-THPP (ultrathin films) <sup>[11]</sup>                           | 532            | 10.3                    | 95                                          |
| copper porphyrin <sup>[3]</sup>                                     | 532            | 0.3 $\text{GW cm}^{-2}$ | 132                                         |
| zinc porphyrin <sup>[3]</sup>                                       | 532            | 0.3 $\text{GW cm}^{-2}$ | 366                                         |
| Ni <sub>3</sub> HHTP <sub>2</sub> <sup>[4]</sup>                    | 532            | 155                     | 46                                          |
| Cu <sub>3</sub> HHTP <sub>2</sub> <sup>[4]</sup>                    | 532            | 155                     | 95                                          |
| P <sub>1</sub> Pt <sup>[12]</sup>                                   | 532            | 2                       | 39                                          |
| P <sub>2</sub> Pt <sup>[12]</sup>                                   | 532            | 2                       | 45                                          |
| ZnP-RGO <sup>[13]</sup>                                             | 532            | 150                     | 6.58                                        |
| PF-RGO <sup>[13]</sup>                                              | 532            | 150                     | 7.07                                        |
| BP/PMMA <sup>[6]</sup>                                              | 532            | 400                     | 8.43                                        |
| F <sub>16</sub> PcGaCl/PMMA <sup>[6]</sup>                          | 532            | 400                     | 74.92                                       |
| RGO/PMMA <sup>[14]</sup>                                            | 532            | 300                     | 129.01                                      |
| PFTP-RGO/PMMA <sup>[14]</sup>                                       | 532            | 300                     | 215.77                                      |
| annealed PFTP-RGO/PMMA <sup>[14]</sup>                              | 532            | 300                     | 296.79                                      |
| BP:C <sub>60</sub> (annealed) <sup>[15]</sup>                       | 532            | 40                      | 87.32                                       |
| BP:C <sub>60</sub> (annealed) <sup>[15]</sup>                       | 532            | 400                     | 241.73                                      |
| V <sub>2</sub> C PMOF (this work)                                   | 532            | 70                      | 483.79                                      |
| Ti <sub>3</sub> C <sub>2</sub> QD/V <sub>2</sub> C PMOF (this work) | 532            | 70                      | 553.69                                      |

**Table S5.** NLO parameters of similar heterostructure.

| <b>samples</b>                                                                                                        | <b>laser</b>          | <b><math>\beta_{\text{eff}}</math> (cm GW<sup>-1</sup>)</b> |
|-----------------------------------------------------------------------------------------------------------------------|-----------------------|-------------------------------------------------------------|
| PIZA-1-5 film <sup>[2]</sup>                                                                                          | 532 nm, 5 ns, 10 Hz   | $4.2 \times 10^4$                                           |
| Pt/CND@PCN-222 film <sup>[16]</sup>                                                                                   | 532 nm, 8.5 ns, 10 Hz | $6.5 \times 10^4$                                           |
| ZnS/Cu-TCPP <sup>[17]</sup>                                                                                           | 532 nm, 30 ps, 10 Hz  | 1.73                                                        |
| Cu-MOF/PVP <sup>[18]</sup>                                                                                            | 532 nm, 21 ps, 10 Hz  | -22                                                         |
| PPy@Cu-MOF/PVP <sup>[18]</sup>                                                                                        | 532 nm, 21 ps, 10 Hz  | 77                                                          |
| $[\text{Zn}_{2.5}\text{Co}_{1.5}(\text{dcpp})_2(\text{DMF})_3(\text{H}_2\text{O})_2]_n$ <sup>[19]</sup>               | 532 nm, 21 ps, 10 Hz  | 27                                                          |
| $[\text{Zn}_{2.5}\text{Co}_{1.5}(\text{dcpp})_2(\text{DMF})_3(\text{H}_2\text{O})_2]_n@ \text{CeO}_2$ <sup>[19]</sup> | 532 nm, 21 ps, 10 Hz  | 35                                                          |

## 2. Theoretical Calculation Methods

All Density Functional Theory (DFT) calculations were performed on the basis of the projector-augmented wave approach in the Cambridge Sequential Total Energy Package. The exchange-correlation function was described by the Perdew-Burke-Ernzerhof generalized gradient approximation using the Tkatchenko-Scheffler method for dispersion correction.<sup>[20]</sup> The ultrasoft pseudo-potential was used to describe the interactions between valence and core electrons. The planewave kinetic energy cut-off and K-points were set to be 300 eV and  $1 \times 1 \times 1$ , respectively. Spin polarization was taken into account during the geometry optimization. Geometry optimization for all atoms modules was performed to allow convergence, with thresholds of maximum displacement of 0.002 Å, maximum force of 0.05 eV Å<sup>-1</sup>, maximum stress of 0.1 GPa, and energy of  $2.0 \times 10^{-5}$  eV per atom.

### 3. Calculation of Nonlinear Absorption Parameters

The total absorption coefficient of the material can be written as:

$$\alpha(I) = -\alpha_0 + \beta I \quad (\text{Equation S1})$$

where  $\alpha_0$  and  $\beta$  are linear absorption coefficient and nonlinear absorption coefficient, respectively.  $I$  is the incident light intensity.

The corresponding light propagation model is expressed as<sup>[21]</sup>:

$$\frac{dI}{dz} = -(\alpha_0 + \beta I)I \quad (\text{Equation S2})$$

As for open aperture Z-scan, the normalized transmittance can be given as<sup>[21]</sup>:

$$T(z) = \sum_{m=0}^{\infty} \frac{\left[ \frac{-\beta_{eff} I_0 L_{eff}}{1 + Z^2/Z_0^2} \right]^m}{(m+1)^{\frac{3}{2}}} \quad (\text{Equation S3})$$

$$L_{eff} = \frac{(1 - e^{-\alpha_0 L})}{\alpha_0} \quad (\text{Equation S4})$$

where  $L_{eff}$  is the effective interaction length,  $\alpha_0$  is the linear absorption coefficient,  $L$  is the sample thickness,  $\beta_{eff}$  is the nonlinear absorption coefficient,  $I_0$  is the on-axis peak intensity at the focal plane, and  $z_0$  is the Rayleigh diffraction length. By fitting the experimental data, the nonlinear absorption coefficient  $\beta_{eff}$  can be obtained.

## References

- [1] Z. Liu, Z. Guo, X. Zhang, J. Zheng, J. Tian, *Carbon* **2013**, 51, 419.
- [2] D. Li, Z. Gu, J. Zhang, *Chem. Sci.* **2020**, 11, 1935.
- [3] M. B. M. Krishna, V. P. Kumar, N. Venkatramaiah, R. Venkatesan, D. N. Rao, *Appl. Phys. Lett.* **2011**, 98, 081106.
- [4] Y. Sun, H. Li, X. Gao, Z. Yu, Z. Huang, C. Zhang, *Adv. Opt. Mater.* **2021**, 9, 2100622.
- [5] C. Zheng, L. Lei, J. Huang, W. Chen, W. Li, H. Wang, L. Huang, D. Huang, *J. Mater. Chem. C* **2017**, 5, 11579.
- [6] Z. Liu, B. Zhang, N. Dong, J. Wang, Y. Chen, *J. Mater. Chem. C* **2020**, 8, 10197.
- [7] M. V. Vijisha, J. Ramesh, C. Arunkumar, K. Chandrasekharan, *J. Mater. Chem. C* **2020**, 8, 12689.
- [8] J. Sun, Y. Sun, C. Yan, D. Lin, Z. Xie, S. Zhou, C. Yuan, H.-L. Zhang, X. Shao, *J. Mater. Chem. C* **2018**, 6, 13114.
- [9] S. Maharjan, K.-S. Liao, A. J. Wang, Z. Zhu, K. Alam, B. P. McElhenny, J. Bao, S. A. Curran, *Chem. Phys. Lett.* **2019**, 714, 149.
- [10] B. W. Xu, R. J. Niu, Q. Liu, J. Y. Yang, W. H. Zhang, D. J. Young, *Dalton Trans* **2020**, 49, 12622.
- [11] R. J. Niu, W. F. Zhou, Y. Liu, J. Y. Yang, W. H. Zhang, J. P. Lang, D. J. Young, *Chem Commun.* **2019**, 55, 4873.
- [12] Z. Liu, J. Sun, C. Yan, Z. Xie, G. Zhang, X. Shao, D. Zhang, S. Zhou, *J. Mater. Chem. C* **2020**, 8, 12993.
- [13] Y. Du, N. Dong, M. Zhang, K. Zhu, R. Na, S. Zhang, N. Sun, G. Wang, J. Wang, *Phys. Chem. Chem. Phys.* **2017**, 19, 2252.
- [14] Z. Liu, N. Dong, P. Jiang, K. Wang, J. Wang, Y. Chen, *Chem. Eur. J.* **2018**, 24, 19317.
- [15] M. Shi, S. Huang, N. Dong, Z. Liu, F. Gan, J. Wang, Y. Chen, *Chem. Commun.* **2018**, 54, 366.
- [16] Y. Xiao, Z. Gu and J. Zhang, *Sci. China Mater.*, 2020, **63**, 1059-1065.
- [17] J. L. Humphrey and D. Kuciauskas, *J. Phys. Chem. C*, 2008, **112**, 1700-1704.
- [18] J. Huang, F. Lang, Y. Cui, L. Xie, K. Geng, Y. Zhao and H. Hou, *Adv. Opt. Mater.*, 2022, **10**, 2201872.
- [19] Y. Sun, W. Xu, F. Lang, H. Wang, F. Pan and H. Hou, *Small*, 2305879.
- [20] S. J. Clark, M. D. Segall, C. J. Pickard, P. J. Hasnip, M. I. J. Probert, K. Refson, M. C. Payne, *Z. Krist.-Cryst. Mater.* **2005**, 220, 567.
- [21] M. Sheik-Bahae, A. A. Said, T. H. Wei, D. J. Hagan, E. W. V. Stryland, *IEEE J. Quantum Elect.* **1990**, 26, 760.
